# Supplementary material
Source: PubMed Central journal article supplement (PMC7648653)
Supplement: mmc1.pdf [file mmc1.pdf]

**Figura 1 suplementaria.** Curva ROC de diferentes puntuaciones para discriminar la presencia de fallo respiratorio.

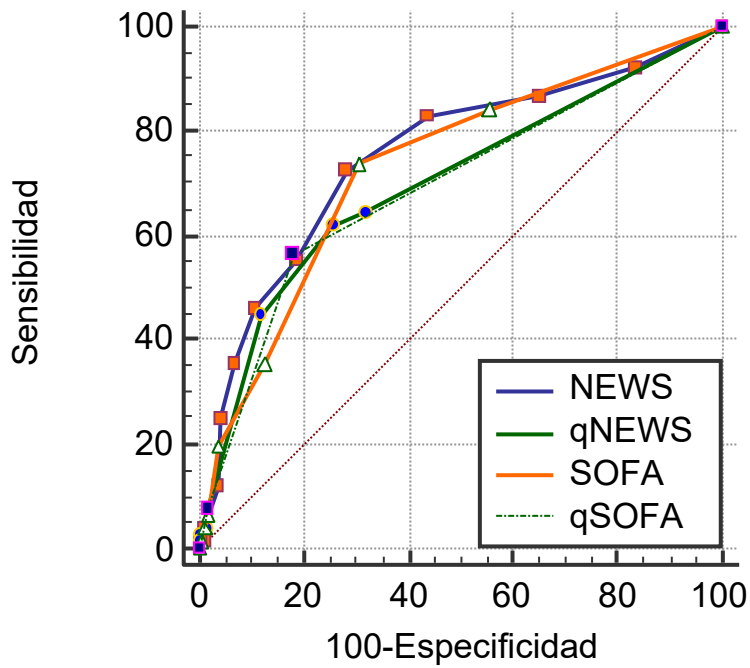

**Figura 2 suplementaria.** Curva ROC de diferentes puntuaciones para discriminar la presencia de mortalidad intrahospitalaria.

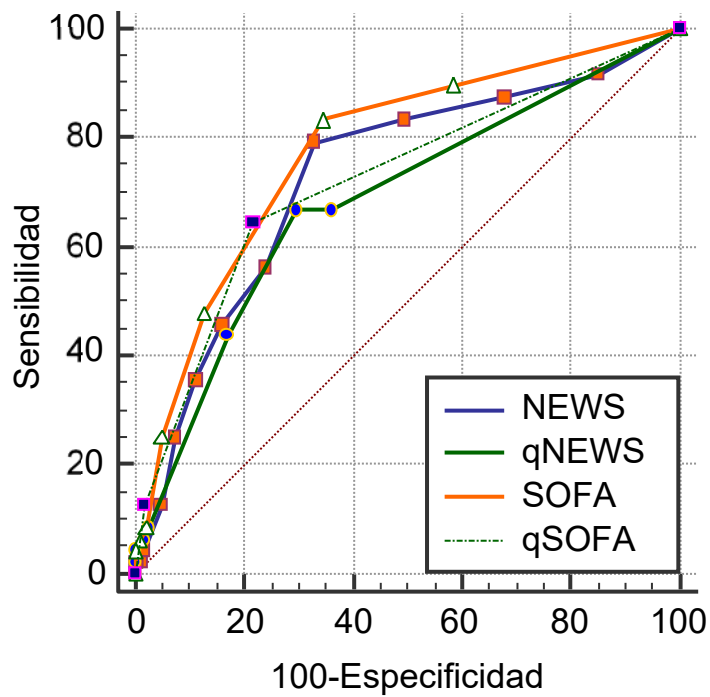

**Tabla 1 suplementaria.** Sistemas de puntuación utilizados en este estudio.

| Variables                                                 | 3   | 2      | 1        | 0        | 1       | 2       | 3         | 4         |
|-----------------------------------------------------------|-----|--------|----------|----------|---------|---------|-----------|-----------|
| <b>qSOFA</b>                                              |     |        |          |          |         |         |           |           |
| Frecuencia respiratoria (respiraciones por minuto)        |     |        | ≥22      |          |         |         |           |           |
| PA sistólica (mm Hg)                                      |     |        | ≤100     |          |         |         |           |           |
| Alteración del estado mental (escala del coma de Glasgow) |     |        | <15      |          |         |         |           |           |
| <b>SOFA</b>                                               |     |        |          |          |         |         |           |           |
| PaO <sub>2</sub> /FiO <sub>2</sub> (mm Hg)                |     |        | >400     | ≤400     | ≤300    | ≤200    | ≤100      |           |
| Plaquetas (x10 <sup>3</sup> /μl)                          |     |        | >150     | ≤150     | ≤100    | ≤50     | ≤20       |           |
| Bilirrubina (mg/dl)                                       |     |        | <1,2     | 1,2-1,9  | 2-5,9   | 6-11,9  | >12       |           |
| Parámetros cardiovasculares                               |     |        | PAM ≥ 70 | PAM < 70 | Dop ≤ 5 | Dop > 5 | Adr ≤ 0,1 | Adr > 0,1 |
| Escala del coma de Glasgow                                |     |        | 15       | 13-14    | 10-12   | 6-9     | <6        |           |
| Creatinina (mg/dl)                                        |     |        | <1,2     | 1,2-1,9  | 2-3,4   | 3,5-4,9 | >5        |           |
| <b>NEWS</b>                                               |     |        |          |          |         |         |           |           |
| Frecuencia respiratoria                                   | ≤8  |        | 9-11     | 12-20    |         | 21-24   | ≥25       |           |
| SpO <sub>2</sub> (%)                                      | ≤91 | 92-93  | 94-95    | ≥96      |         |         |           |           |
| Oxigenoterapia                                            |     | Sí     |          | No       |         |         |           |           |
| Temperatura (°C)                                          | ≤35 |        | 35,1-36  | 36,1-38  | 38,1-39 | ≥39,1   |           |           |
| PA sistólica (mm Hg)                                      | ≤90 | 91-100 | 101-110  | 111-219  |         |         | ≥220      |           |
| Frecuencia cardíaca (latidos por minuto)                  | ≤40 |        | 41-50    | 51-90    | 91-110  | 111-130 | ≥131      |           |
| Nivel de conciencia (AVDN)                                |     |        |          | A        |         |         | V, D o N  |           |
| <b>qNEWS</b>                                              |     |        |          |          |         |         |           |           |
| Frecuencia respiratoria                                   | ≤8  |        | 9-11     | 12-20    |         | 21-24   | ≥25       |           |
| PA sistólica (mm Hg)                                      | ≤90 | 91-100 | 101-110  | 111-219  |         |         | ≥220      |           |
| Nivel de conciencia                                       |     |        |          | A        |         |         | V, D o N  |           |

**Abreviaturas:** PaO<sub>2</sub>: presión parcial de oxígeno; SpO<sub>2</sub>: pulsioximetría periférica; PAM: presión arterial media; Dop: dopamina; Adr: adrenalina; A: alerta; V: reacciona a estímulo verbal; D: reacciona a estímulo doloroso; N: no reacciona a estímulos.

**Tabla 2 suplementaria.** Características demográficas y clínicas de la población del estudio (n=237).

| <b>Variable</b>                                                                        |                  |
|----------------------------------------------------------------------------------------|------------------|
| <b>Características basales</b>                                                         |                  |
| Edad en años, mediana (IIC)                                                            | 65,9 (49,7-79,2) |
| Varones, n (%)                                                                         | 143 (60,3 %)     |
| Puntuación en el Índice de comorbilidad de Charlson, mediana (IIC)                     | 3 (1-5)          |
| Raza/grupo étnico, n (%)                                                               |                  |
| Raza blanca                                                                            | 163 (68,8 %)     |
| Hispanoamericanos                                                                      | 48 (20,3 %)      |
| Días transcurridos entre el comienzo de los síntomas y la PCR positiva, mediana (IIC)* | 5 (3-7)          |
| <b>Signos clínicos en el momento del ingreso</b>                                       |                  |
| Temperatura (°C), n (%)                                                                | 37,92±1,008      |
| Presión arterial sistólica (mm Hg), mediana (IIC)                                      | 126 (116-140)    |
| Frecuencia respiratoria (respiraciones por minuto), mediana (IIC)                      | 17 (14-21)       |
| Frecuencia cardíaca (latidos por minuto), mediana (IIC)                                | 91 (80-103)      |
| Disnea, n (%)                                                                          | 125 (52,7 %)     |
| Alteración del estado mental, n (%)                                                    | 16 (6,8 %)       |
| <b>Signos analíticos y radiológicos en el momento del ingreso</b>                      |                  |
| PaO <sub>2</sub> (mm Hg), mediana (IIC)                                                | 69 (55-96)       |
| SpO <sub>2</sub> (%), mediana (IIC)                                                    | 95 (91-97)       |
| PAFI, mediana (IIC)                                                                    | 375 (270-450)    |
| Bilirrubina total (mg/dl), mediana (IIC)                                               | 0,4 (0,3-0,6)    |
| Creatinina (mg/dl), mediana (IIC)                                                      | 0,87 (0,7-1,12)  |
| Plaquetas (x10 <sup>3</sup> /μl), mediana (IIC)                                        | 183 (144-239,5)  |
| Anomalías en la radiografía de tórax, n (%)                                            | 189 (79,7 %)     |
| <b>Puntuaciones en el momento del ingreso</b>                                          |                  |
| SOFA, mediana (RIC)                                                                    | 1 (0-2)          |
| SOFA ≥ 2, n (%)                                                                        | 105 (44,3 %)     |
| qSOFA, mediana (IIC)                                                                   | 0 (0-1)          |
| qSOFA ≥ 1, n (%)                                                                       | 72 (30,4 %)      |
| NEWS, mediana (IIC)                                                                    | 3 (1-5)          |
| NEWS ≥ 4, n (%)                                                                        | 100 (42,2 %)     |
| qNEWS, mediana (IIC)                                                                   | 0 (0-2)          |
| qNEWS ≥ 2, n (%)                                                                       | 88 (37,1 %)      |
| <b>Complicaciones y evolución</b>                                                      |                  |
| Oxigenoterapia, n (%)                                                                  | 167 (70,5 %)     |
| Días transcurridos entre la PCR positiva y la oxigenoterapia, mediana (IIC)            | 0 (0-1)          |
| Ingreso en la UCI, n (%)                                                               | 29 (12,2 %)      |
| Días transcurridos entre la PCR positiva y el ingreso en la UCI, mediana (IIC)         | 1 (1-5)          |
| Fallo respiratorio, n (%)                                                              | 77 (32,5 %)      |
| Días transcurridos entre la PCR positiva y el fallo respiratorio, mediana (IIC)        | 3 (1-5,7)        |

| Variable                                                                                  |             |
|-------------------------------------------------------------------------------------------|-------------|
| Mortalidad intrahospitalaria, n (%)                                                       | 49 (20,7 %) |
| Días transcurridos entre la PCR positiva y la mortalidad intrahospitalaria, mediana (IIC) | 9 (7-12)    |

Los datos se presentan en forma de media  $\pm$  desviación estándar o mediana con rango intercuartílico (IIC) o en forma de valor absoluto (porcentaje).

<sup>a</sup> RT-PCR: primera reacción en cadena de la polimerasa con retrotranscripción inversa en tiempo real positiva para SARS-CoV-2.

<sup>b</sup> Disponible únicamente en 120 casos. En caso de no disponer del valor de pO<sub>2</sub>, se calculó el SAFI (SpO<sub>2</sub>/FiO<sub>2</sub>) en lugar del PAFI.

**Abreviaturas:** PaO<sub>2</sub>: presión parcial de oxígeno; SpO<sub>2</sub>: pulsioximetría periférica; PAFI: puntuación PaO<sub>2</sub>/FiO<sub>2</sub>; UCI: unidad de cuidados intensivos.

**Tabla 3 suplementaria.** Comparación emparejada de curvas ROC.

|                      | Fallo respiratorio     |                |      | Mortalidad intrahospitalaria |                |             |
|----------------------|------------------------|----------------|------|------------------------------|----------------|-------------|
|                      | Diferencia entre áreas | IC del 95 %    | p    | Diferencia entre áreas       | IC del 95 %    | p           |
| SOFA frente a qSOFA  | 0,038                  | -0,045 a 0,121 | 0,36 | 0,056                        | -0,027 a 0,139 | 0,19        |
| SOFA frente a qNEWS  | 0,032                  | -0,056 a 0,121 | 0,47 | 0,094                        | 0,009 a 0,179  | <b>0,03</b> |
| SOFA frente a NEWS   | 0,020                  | -0,056 a 0,096 | 0,60 | 0,049                        | -0,025 a 0,124 | 0,19        |
| qSOFA frente a qNEWS | 0,005                  | -0,064 a 0,076 | 0,87 | 0,038                        | -0,022 a 0,099 | 0,21        |
| qSOFA frente a NEWS  | 0,058                  | -0,009 a 0,126 | 0,09 | 0,006                        | -0,064 a 0,077 | 0,85        |
| qNEWS frente a NEWS  | 0,052                  | -0,017 a 0,123 | 0,14 | 0,045                        | -0,024 a 0,115 | 0,21        |

IC: intervalo de confianza.
